# Supplementary material
Source: PubMed Central journal article supplement (PMC4287833)

## Supporting Information

### Discovery of a Heparan Sulfate 3-*O*-Sulfation Specific Peeling Reaction

Yu Huang<sup>†, ‡</sup>, Yang Mao<sup>†, ‡, \*</sup>, Chengli Zong<sup>§</sup>, Cheng Lin<sup>†</sup>, Geert-Jan Boons<sup>§</sup>, and Joseph Zaia<sup>†\*</sup>

<sup>†</sup>Dept. of Biochemistry, Boston University Medical Campus, Boston, MA, 02118

<sup>§</sup>Complex Carbohydrate Research Center, University of Georgia, Athens, GA, 30602

<sup>‡</sup>These authors contributed equally to this work

\* Co-corresponding authors:

Joseph Zaia

Center for Biomedical Mass Spectrometry

Boston University Medical Campus

670 Albany St., Rm. 509

Boston, MA 02118

(v) 617-638-6762

(f) 617-638-6761

(e) [jzaia@bu.edu](mailto:jzaia@bu.edu)

Yang Mao

Center for Biomedical Mass Spectrometry

Boston University Medical Campus

670 Albany St., Rm. 504

Boston, MA 02118

(e) [yangmao@bu.edu](mailto:yangmao@bu.edu)

**Supplemental Figure 1.** Structural determination of the base-susceptible hexasaccharide [1,2,3,1,7] by EDD tandem mass spectrometry. The numbers on the cleavage map indicate the maximum number of sulfates found from the fragmentation on that cleavage position.

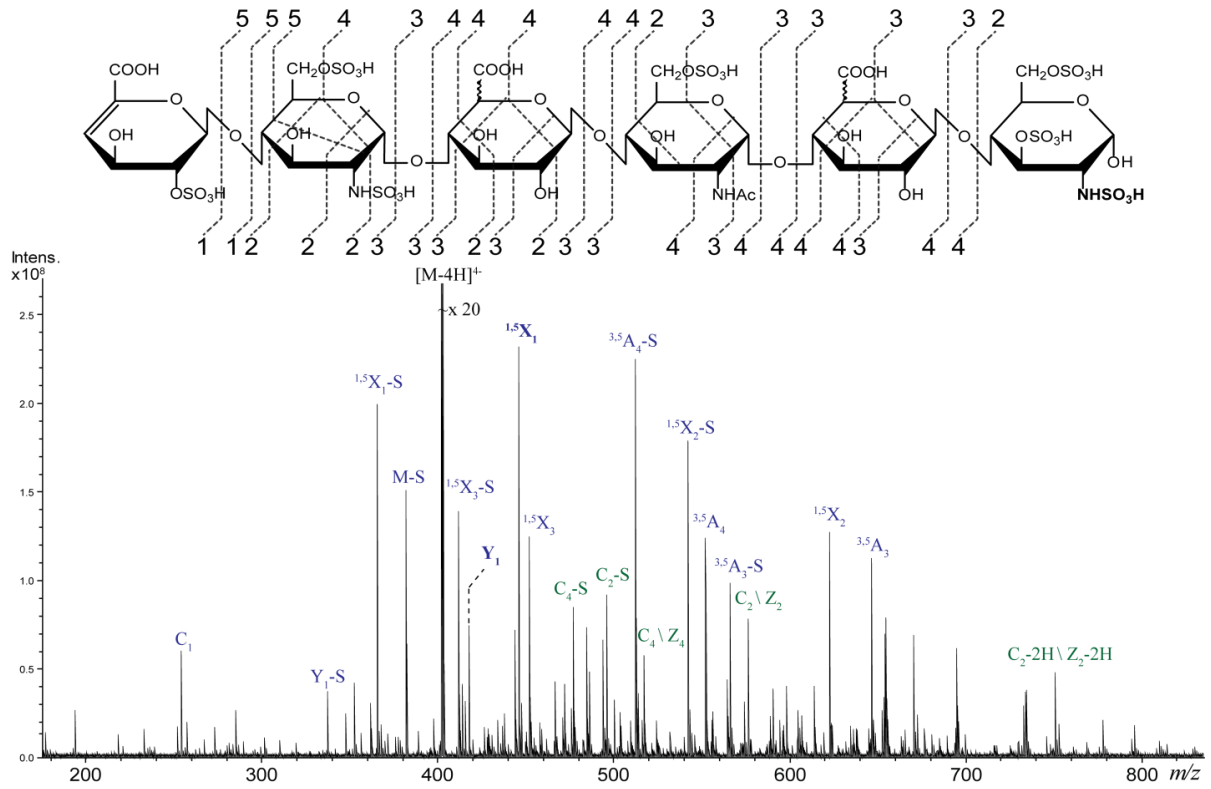

**Supplemental Figure 2.** The efficiency of Hs3st-1 modification on the tetrasaccharides. The desalted products were analyzed on HILIC-MS. Blue profile shows the charge state merged EICs of the Hs3st-1 modified synthetic tetrasaccharide. Red profile shows the charge state merged EICs of the intact tetrasaccharide.

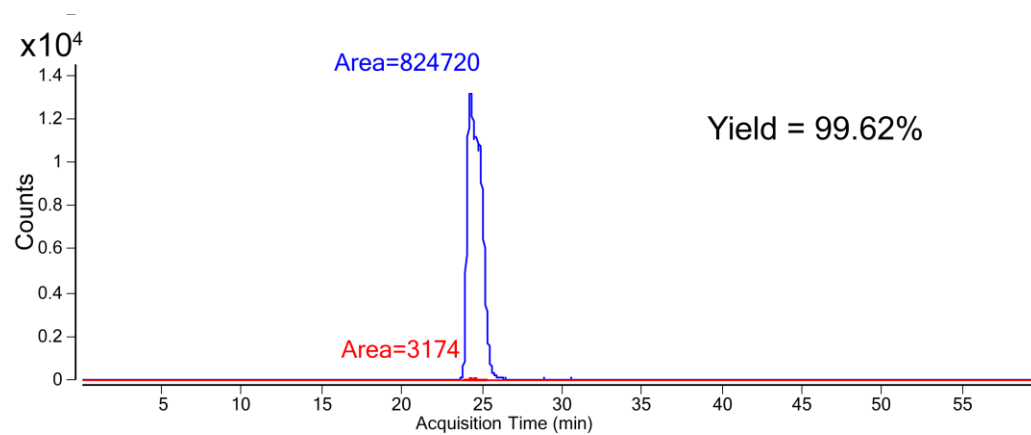

**Supplemental Figure 3.** EICs of the SEC-MS analysis of the digestion and degradation products from the Hs3st-1 modified synthetic tetrasaccharide at pH 8.0. Peak a shows the charge state merged EICs of the digestion product  $\Delta$ Hex2S-GlcNS6S-R. Peak b shows the charge state merged EICs of the digestion product GlcA-GlcNS3S. Peak c shows the EICs of the degradation product with  $m/z$  416.05. Peak d shows the EICs of the degradation product with  $m/z$  434.06.

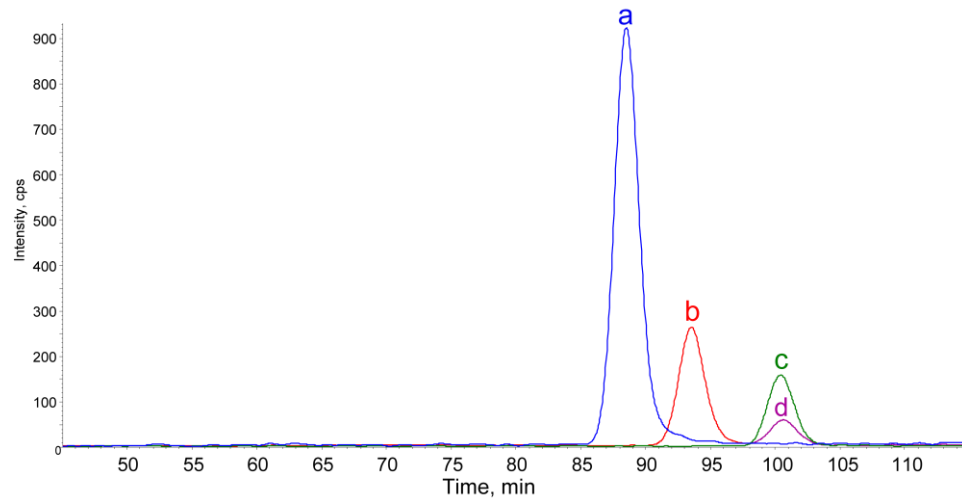

**Supplemental Figure 4.** EICs of the HILIC-MS analysis of the degradation products from the base-susceptible hexasaccharide [1,2,3,1,7] treated with 0.1 M  $\text{NH}_3 \cdot \text{H}_2\text{O}$ . Peak **b** shows the charge state merged EICs of [1,2,3,1,7]. Peak **a** shows the charge state merged EICs of the degradation product [1,2,2,1,4]. Peak **d** shows the EICs of the intermediate product with  $m/z$  matching to the composition of [1,2,3,1,7] after a loss of one water molecule ( $\text{H}_2\text{O}$ ) and one sulfo group ( $-\text{SO}_3$ ). Peak **c** shows the EICs of the side product with  $m/z$  matching to the composition of [1,2,3,1,6] or the composition of the intermediate product **d** with an addition of one water molecule ( $\text{H}_2\text{O}$ ).

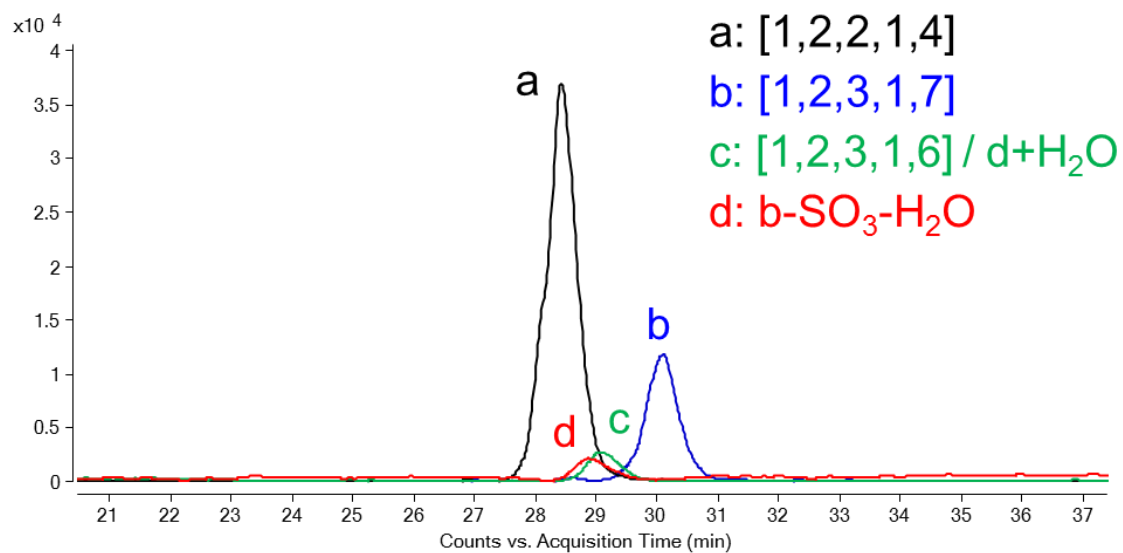

**Supplemental Figure 5.** Elevated temperature speeds up the peeling reaction. The base-susceptible hexasaccharide [1,2,3,1,7] treated with 50 mM  $\text{NH}_3 \cdot \text{H}_2\text{O}$  at either room temperature (RT) or 37 °C overnight. The products were analyzed on HILIC-MS with or without vacuum drying process. The control sample was incubated with ddH<sub>2</sub>O at RT and analyzed without vacuum drying. Peak b shows the charge state merged EICs of [1,2,3,1,7]. Peak a shows the charge state merged EICs of the degradation product [1,2,2,1,4]. The result demonstrates that elevated temperature speeds up the peeling reaction on the base-susceptible hexasaccharide [1,2,3,1,7].

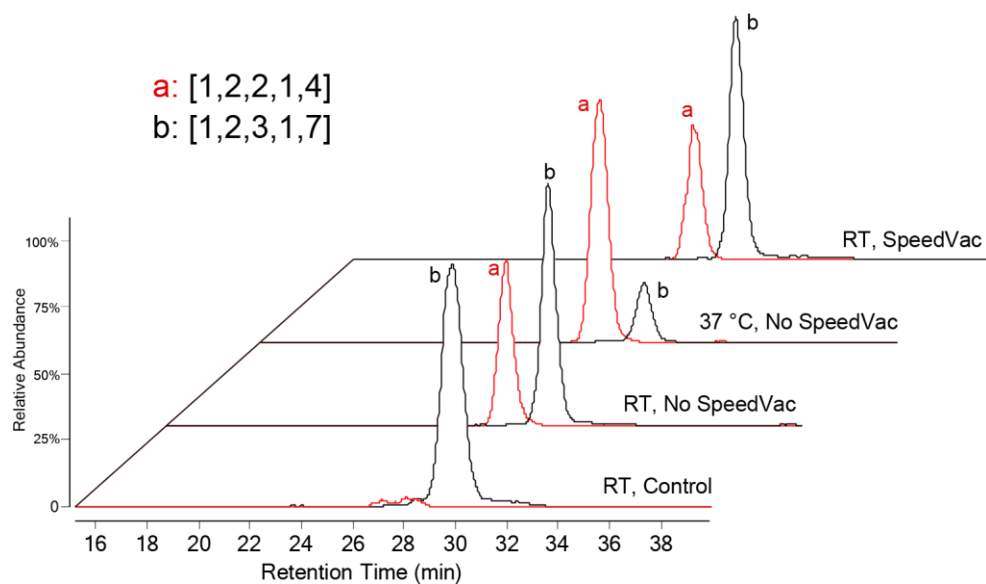

Supplement: ac503248k_si_002.pdf [file ac503248k_si_002.pdf]
